# Supplementary material for: Alterations in the epithelial stem cell compartment could contribute to permanent changes in the mucosa of patients with ulcerative colitis
Source: PubMed Central journal article supplement — Gut. 2016 Nov 1;66(12):2069–79. doi: 10.1136/gutjnl-2016-312609 (PMC5749340; doi:10.1136/gutjnl-2016-312609), 2016-11-01
Supplement: gutjnl-2016-312609supp001.pdf [file gutjnl-2016-312609supp001.pdf]

**A)**

|                                                                          | N  | Age*<br>(years) | Gender | Extension | Treatment    | Sample<br>type | Sample<br>location | Mayo <sup>†</sup><br>0/1/2/3 | Duration*<br>(years) |
|--------------------------------------------------------------------------|----|-----------------|--------|-----------|--------------|----------------|--------------------|------------------------------|----------------------|
| Group 1 (Organoid culture, microarray, qPCR, immunostaining, ISH, ELISA) |    |                 |        |           |              |                |                    |                              |                      |
| Ctrl                                                                     | 11 | 53.5 (30-77)    | 8/3    | -         | -            | 6/5            | 0/10/1/0/0         | -                            | -                    |
| UC                                                                       | 8  | 44.3 (37-54)    | 6/2    | 0/4/4     | 0/2/1/3/1/1  | 0/8            | 0/8/0/0/0          | 6/2/0/0                      | 14 (8-18)            |
| Group 2 (qPCR)                                                           |    |                 |        |           |              |                |                    |                              |                      |
| Ctrl                                                                     | 13 | 42 (25-56)      | 4/9    | -         | -            | 0/13           | 0/13/0/0/0         | -                            | -                    |
| UC<br>remission                                                          | 24 | 47 (23-71)      | 11/13  | 0/18/6    | 4/14/0/5/0/1 | 0/24           | 0/24/0/0/0         | 24/0/0/0                     | 8.7 (0-22)           |
| UC active                                                                | 11 | 47 (28-71)      | 9/2    | 0/11/0    | 3/2/1/0/5/0  | 0/11           | 0/11/0/0/0         | 0/1/3/7                      | 5.3 (0-17)           |
| Group 3 (Immunostaining)                                                 |    |                 |        |           |              |                |                    |                              |                      |
| Ctrl                                                                     | 4  | 57 (56-59)      | 2/2    | -         | -            | 4/0            | 0/4/0/0/0          | -                            | -                    |
| UC<br>remission                                                          | 4  | 64 (55-77)      | 2/2    | 0/0/4     | 0/2/0/2/0/0  | 0/4            | 0/4/0/0/0          | 4/0/0/0                      | 16.2 (11-29)         |
| UC active                                                                | 10 | 41 (21-50)      | 6/4    | 0/0/10    | 0/0/1/0/9/0  | 10/0           | 0/2/3/2/3          | 0/0/5/5                      | 7.1 (2-14)           |

**B)**

|                                  | N | Age*<br>(years) | Gender | Extension | Phenotype | Treatment   | Sample<br>type | Sample<br>location | SES-CD <sup>††</sup><br>0/1/2/3 | Duration*<br>(years) |
|----------------------------------|---|-----------------|--------|-----------|-----------|-------------|----------------|--------------------|---------------------------------|----------------------|
| Group 1 (Organoid culture, qPCR) |   |                 |        |           |           |             |                |                    |                                 |                      |
| Ctrl                             | 6 | 55 (49-63)      | 4/2    | -         | -         | -           | 1/5            | 0/6/0/0/0          | -                               | -                    |
| CD                               | 8 | 46 (19-69)      | 6/2    | 0/4/4     | 5/1/0/2   | 3/1/0/1/1/2 | 0/8            | 0/8/0/0/0          | 5/2/1/0                         | 13.3 (2-36)          |

**Supplementary Table 1. Clinical and demographic descriptions of the non-IBD controls (Ctrl) and patients with A) Ulcerative Colitis (UC) B) Crohn's Disease (CD), included in the study.**

\*Mean (range).

Gender: Male/Female

Extension (UC): proctitis/left-sided/pancolitis

Extension (CD): ileal/colonic/ileo-colonic

Phenotype (CD): no stricturing, no penetrating/structuring/penetrating/perianal disease

Treatment: None/Mesalazine/ Steroids/Immunosuppressants/TNF inhibitors/

Immunosuppressant+TNF inhibitors

Sample type: Surgical sample/biopsy sample

Sample location: Rectum/Sigma/Descending/Transverse/Ascending

<sup>†</sup> Mayo referred to the colonic segment used for the analysis

<sup>††</sup> SES-CD referred to the colonic segment used for the analysis

N: number of patients included in the analysis

qPCR: quantitative real-time RT-PCR

ISH: *in situ* hybridization

ELISA: enzyme-linked immunosorbent assay
