# Supplementary material for: Alterations in the epithelial stem cell compartment could contribute to permanent changes in the mucosa of patients with ulcerative colitis
Source: PubMed Central journal article supplement — Gut. 2016 Nov 1;66(12):2069–79. doi: 10.1136/gutjnl-2016-312609 (PMC5749340; doi:10.1136/gutjnl-2016-312609), 2016-11-01
Supplement: gutjnl-2016-312609supp002.pdf [file gutjnl-2016-312609supp002.pdf]

**Supplementary Table 2:** Signature of genes differentially expressed in UC compared to Ctrl (non-IBD) organoid cultures and its alignment with the previously published profiles obtained from colonic (GSE75916) and GI tract region (GSE38713) biopsy samples. Genes are grouped according to their differential expression in UC vs. Ctrl EpOCs, d-EpOCs, or both. Fold change (fch) and corresponding p value (pval) of genes with significant ( $P \leq .05$ ) deregulation in both UC organoid and biopsy samples are depicted in bold.

|                          | EPITHELIAL ORGANOID CULTURES (GSE75916) |             |                 |             | COLONIC BIOPSIES (GSE38713) |             |                |             | GASTROINTESTINAL TRACT REGION BIOPSIES (GSE10867) |             |                |             |               |             |               |             |
|--------------------------|-----------------------------------------|-------------|-----------------|-------------|-----------------------------|-------------|----------------|-------------|---------------------------------------------------|-------------|----------------|-------------|---------------|-------------|---------------|-------------|
|                          | UC/Ctrl EpOCs                           |             | UC/Ctrl d-EpOCs |             | UC remission/Ctrl           |             | UC active/Ctrl |             | Antrum/Colon                                      |             | Duodenum/Colon |             | Jejunum/Colon |             | Ileum/Colon   |             |
| Gene                     | fch                                     | pval        | fch             | pval        | fch                         | pval        | fch            | pval        | fch                                               | pval        | fch            | pval        | fch           | pval        | fch           | pval        |
| <b>EpOCs and d-EpOCs</b> |                                         |             |                 |             |                             |             |                |             |                                                   |             |                |             |               |             |               |             |
| ANXA10                   | <b>6,31</b>                             | <b>0,00</b> | <b>3,41</b>     | <b>0,01</b> | 1,02                        | 0,48        | 2,70           | 0,08        | <b>17,70</b>                                      | <b>0,01</b> | <b>22,04</b>   | <b>0,00</b> | <b>6,03</b>   | <b>0,00</b> | 1,39          | 0,07        |
| LYZ                      | <b>5,19</b>                             | <b>0,00</b> | <b>2,52</b>     | <b>0,00</b> | <b>1,76</b>                 | <b>0,00</b> | <b>1,85</b>    | <b>0,00</b> | <b>5,24</b>                                       | <b>0,00</b> | <b>6,92</b>    | <b>0,00</b> | <b>4,43</b>   | <b>0,00</b> | <b>2,99</b>   | <b>0,00</b> |
| SERPINB2                 | <b>4,16</b>                             | <b>0,00</b> | <b>2,33</b>     | <b>0,04</b> | 1,04                        | 0,32        | 1,23           | 0,19        | 1,10                                              | 0,38        | 1,04           | 0,64        | -1,04         | 0,63        | -1,00         | 0,99        |
| CYP1A1                   | <b>2,80</b>                             | <b>0,02</b> | <b>1,62</b>     | <b>0,02</b> | -1,18                       | 0,46        | -1,22          | 0,24        | 1,07                                              | 0,59        | 1,29           | 0,06        | 1,28          | 0,05        | 1,09          | 0,43        |
| KRT17                    | <b>2,72</b>                             | <b>0,01</b> | <b>1,92</b>     | <b>0,01</b> | 1,11                        | 0,02        | <b>1,74</b>    | <b>0,00</b> | 1,14                                              | 0,36        | 1,13           | 0,19        | 1,05          | 0,47        | 1,05          | 0,57        |
| IFITM2                   | <b>1,81</b>                             | <b>0,03</b> | <b>1,64</b>     | <b>0,04</b> | <b>1,55</b>                 | <b>0,02</b> | <b>5,82</b>    | <b>0,00</b> | 1,22                                              | 0,33        | -1,27          | 0,30        | -1,35         | 0,06        | 1,23          | 0,25        |
| ALOX5                    | <b>1,66</b>                             | <b>0,02</b> | <b>1,88</b>     | <b>0,00</b> | 1,61                        | 0,05        | <b>3,90</b>    | <b>0,00</b> | -1,06                                             | 0,59        | -1,03          | 0,69        | -1,10         | 0,19        | 1,15          | 0,24        |
| TBX3                     | <b>1,60</b>                             | <b>0,00</b> | <b>1,76</b>     | <b>0,04</b> | 1,07                        | 0,78        | 1,16           | 0,43        | 1,01                                              | 0,96        | <b>2,29</b>    | <b>0,00</b> | <b>2,93</b>   | <b>0,00</b> | <b>2,01</b>   | <b>0,00</b> |
| HYAL1                    | <b>1,57</b>                             | <b>0,00</b> | <b>1,64</b>     | <b>0,00</b> | <b>2,89</b>                 | <b>0,00</b> | <b>5,04</b>    | <b>0,00</b> | <b>1,63</b>                                       | <b>0,04</b> | 1,15           | 0,34        | -1,05         | 0,65        | -1,21         | 0,19        |
| FLNC                     | <b>1,51</b>                             | <b>0,01</b> | <b>1,72</b>     | <b>0,00</b> | <b>1,63</b>                 | <b>0,00</b> | <b>1,88</b>    | <b>0,00</b> | 1,07                                              | 0,52        | 1,36           | 0,01        | 1,09          | 0,26        | 1,02          | 0,81        |
| SPINK5                   | <b>-1,59</b>                            | <b>0,00</b> | <b>-1,72</b>    | <b>0,01</b> | <b>6,57</b>                 | <b>0,00</b> | <b>4,34</b>    | <b>0,00</b> | -1,24                                             | 0,63        | -1,97          | 0,12        | -2,05         | 0,09        | <b>-2,38</b>  | <b>0,03</b> |
| HOXB13                   | <b>-1,55</b>                            | <b>0,05</b> | <b>-1,54</b>    | <b>0,04</b> | <b>3,80</b>                 | <b>0,03</b> | -1,02          | 0,96        | -1,12                                             | 0,31        | -1,04          | 0,70        | -1,02         | 0,78        | -1,11         | 0,25        |
| PLA2G2A                  | <b>-1,67</b>                            | <b>0,00</b> | <b>-2,80</b>    | <b>0,00</b> | <b>4,16</b>                 | <b>0,00</b> | <b>8,77</b>    | <b>0,00</b> | -1,83                                             | 0,48        | 1,77           | 0,38        | 2,60          | 0,12        | <b>5,12</b>   | <b>0,00</b> |
| CKB                      | <b>-1,68</b>                            | <b>0,02</b> | <b>-2,13</b>    | <b>0,00</b> | 1,11                        | 0,58        | <b>-5,37</b>   | <b>0,00</b> | <b>-6,19</b>                                      | <b>0,00</b> | <b>-10,84</b>  | <b>0,00</b> | <b>-13,40</b> | <b>0,00</b> | <b>-13,46</b> | <b>0,00</b> |
| UGT2A3                   | <b>-1,72</b>                            | <b>0,00</b> | <b>-1,88</b>    | <b>0,04</b> | <b>-3,44</b>                | <b>0,00</b> | <b>-13,68</b>  | <b>0,00</b> | -1,49                                             | 0,10        | 1,38           | 0,27        | <b>2,43</b>   | <b>0,00</b> | 1,40          | 0,20        |
| IL33                     | <b>-1,82</b>                            | <b>0,02</b> | <b>-2,31</b>    | <b>0,02</b> | <b>3,05</b>                 | <b>0,00</b> | <b>4,28</b>    | <b>0,00</b> | 1,20                                              | 0,07        | 1,02           | 0,80        | 1,02          | 0,74        | 1,13          | 0,13        |
| IGFBP2                   | <b>-2,00</b>                            | <b>0,04</b> | <b>-2,15</b>    | <b>0,02</b> | -1,50                       | 0,38        | <b>2,51</b>    | <b>0,01</b> | <b>2,88</b>                                       | <b>0,05</b> | <b>1,67</b>    | <b>0,01</b> | 1,08          | 0,60        | -1,31         | 0,07        |
| PID1                     | <b>-2,01</b>                            | <b>0,01</b> | <b>-1,59</b>    | <b>0,02</b> | <b>-1,87</b>                | <b>0,00</b> | <b>-1,68</b>   | <b>0,00</b> | <b>-1,87</b>                                      | <b>0,00</b> | <b>-2,76</b>   | <b>0,00</b> | <b>-2,71</b>  | <b>0,00</b> | -1,56         | 0,09        |
| HRCT1                    | <b>-2,05</b>                            | <b>0,00</b> | <b>-2,04</b>    | <b>0,03</b> | -1,57                       | 0,11        | <b>-2,31</b>   | <b>0,01</b> | ---                                               | ---         | ---            | ---         | ---           | ---         | ---           | ---         |
| ERP27                    | <b>-2,28</b>                            | <b>0,00</b> | <b>-2,02</b>    | <b>0,03</b> | -1,10                       | 0,47        | <b>1,73</b>    | <b>0,02</b> | ---                                               | ---         | ---            | ---         | ---           | ---         | ---           | ---         |
| PF4                      | <b>-2,34</b>                            | <b>0,00</b> | <b>-2,03</b>    | <b>0,00</b> | <b>1,48</b>                 | <b>0,03</b> | <b>5,46</b>    | <b>0,00</b> | -1,00                                             | 0,98        | -1,05          | 0,59        | 1,05          | 0,57        | 1,01          | 0,89        |
| TNNC1                    | <b>-2,42</b>                            | <b>0,00</b> | <b>-1,81</b>    | <b>0,01</b> | 2,14                        | 0,09        | -1,55          | 0,12        | -1,08                                             | 0,37        | -1,00          | 0,98        | -1,08         | 0,30        | -1,15         | 0,07        |
| TUSC3                    | <b>-2,56</b>                            | <b>0,03</b> | <b>-1,94</b>    | <b>0,04</b> | <b>2,70</b>                 | <b>0,01</b> | <b>1,93</b>    | <b>0,04</b> | 1,25                                              | 0,07        | 1,24           | 0,05        | 1,33          | 0,00        | 1,16          | 0,11        |
| HMGCS2                   | <b>-2,69</b>                            | <b>0,00</b> | <b>-2,11</b>    | <b>0,01</b> | <b>-4,55</b>                | <b>0,00</b> | <b>-25,40</b>  | <b>0,00</b> | <b>-15,90</b>                                     | <b>0,00</b> | <b>-2,57</b>   | <b>0,00</b> | <b>-2,15</b>  | <b>0,00</b> | <b>-10,61</b> | <b>0,00</b> |
| <b>EpOCs</b>             |                                         |             |                 |             |                             |             |                |             |                                                   |             |                |             |               |             |               |             |
| KLK7                     | <b>3,30</b>                             | <b>0,04</b> | 2,36            | 0,07        | 1,01                        | 0,92        | 1,05           | 0,64        | -1,01                                             | 0,91        | 1,06           | 0,55        | 1,07          | 0,42        | -1,06         | 0,64        |
| UBD                      | <b>2,18</b>                             | <b>0,02</b> | 1,40            | 0,41        | 2,16                        | 0,20        | <b>14,20</b>   | <b>0,00</b> | 1,26                                              | 0,53        | -1,81          | 0,01        | -1,44         | 0,12        | <b>4,76</b>   | <b>0,01</b> |
| BLVRA                    | <b>2,15</b>                             | <b>0,00</b> | 1,42            | 0,10        | 1,31                        | 0,13        | <b>3,43</b>    | <b>0,00</b> | 1,32                                              | 0,02        | -1,00          | 0,97        | -1,00         | 0,95        | 1,26          | 0,09        |
| AKAP12                   | <b>2,04</b>                             | <b>0,02</b> | 1,27            | 0,25        | <b>2,82</b>                 | <b>0,00</b> | <b>2,06</b>    | <b>0,01</b> | -1,06                                             | 0,47        | -1,10          | 0,34        | 1,04          | 0,55        | 1,16          | 0,10        |
| NPTX2                    | <b>2,04</b>                             | <b>0,03</b> | 1,29            | 0,52        | 1,76                        | 0,12        | <b>8,14</b>    | <b>0,00</b> | ---                                               | ---         | ---            | ---         | ---           | ---         | ---           | ---         |
| SYT1                     | <b>1,91</b>                             | <b>0,00</b> | 1,20            | 0,07        | ---                         | ---         | ---            | ---         | ---                                               | ---         | ---            | ---         | ---           | ---         | ---           | ---         |
| NMUR2                    | <b>1,89</b>                             | <b>0,04</b> | 1,34            | 0,54        | 1,01                        | 0,85        | 1,33           | 0,20        | ---                                               | ---         | ---            | ---         | ---           | ---         | ---           | ---         |
| KLK10                    | <b>1,87</b>                             | <b>0,05</b> | 1,24            | 0,17        | 1,01                        | 0,68        | <b>10,89</b>   | <b>0,00</b> | 1,16                                              | 0,29        | 1,10           | 0,25        | 1,17          | 0,05        | 1,06          | 0,52        |
| CLDN2                    | <b>1,85</b>                             | <b>0,02</b> | 1,23            | 0,37        | 1,28                        | 0,17        | <b>4,21</b>    | <b>0,00</b> | ---                                               | ---         | ---            | ---         | ---           | ---         | ---           | ---         |
| BAG2                     | <b>1,74</b>                             | <b>0,02</b> | 1,25            | 0,23        | <b>2,10</b>                 | <b>0,00</b> | <b>3,71</b>    | <b>0,00</b> | ---                                               | ---         | ---            | ---         | ---           | ---         | ---           | ---         |
| WWTR1                    | <b>1,72</b>                             | <b>0,03</b> | 1,41            | 0,15        | <b>2,49</b>                 | <b>0,00</b> | <b>1,75</b>    | <b>0,01</b> | ---                                               | ---         | ---            | ---         | ---           | ---         | ---           | ---         |
| PTPN13                   | <b>1,72</b>                             | <b>0,00</b> | 1,21            | 0,07        | 1,33                        | 0,04        | <b>1,65</b>    | <b>0,00</b> | ---                                               | ---         | ---            | ---         | ---           | ---         | ---           | ---         |
| TRBC2                    | <b>1,71</b>                             | <b>0,02</b> | 1,34            | 0,11        | ---                         | ---         | ---            | ---         | 1,40                                              | 0,25        | -1,64          | 0,13        | -1,46         | 0,19        | <b>2,43</b>   | <b>0,05</b> |
| PEX6                     | <b>1,71</b>                             | <b>0,01</b> | 1,68            | 0,06        | -1,44                       | 0,15        | -1,01          | 0,96        | 1,18                                              | 0,38        | 1,16           | 0,52        | 1,09          | 0,60        | 1,03          | 0,87        |
| L1TD1                    | <b>1,69</b>                             | <b>0,03</b> | 1,11            | 0,20        | -1,38                       | 0,50        | <b>3,11</b>    | <b>0,01</b> | -1,31                                             | 0,03        | -1,36          | 0,00        | -1,24         | 0,02        | -1,28         | 0,02        |
| TRIB2                    | <b>1,68</b>                             | <b>0,01</b> | 1,58            | 0,07        | <b>2,28</b>                 | <b>0,02</b> | <b>11,63</b>   | <b>0,00</b> | 1,46                                              | 0,01        | 1,25           | 0,02        | 1,23          | 0,01        | 1,20          | 0,07        |

|                |       |      |       |      |       |      |        |      |       |      |       |      |       |      |       |      |
|----------------|-------|------|-------|------|-------|------|--------|------|-------|------|-------|------|-------|------|-------|------|
| S100A8         | 1,65  | 0,03 | -1,06 | 0,24 | -1,26 | 0,61 | 236,47 | 0,00 | -1,40 | 0,22 | -1,54 | 0,16 | -1,49 | 0,18 | 1,21  | 0,57 |
| BMP4           | 1,64  | 0,01 | 1,29  | 0,07 | 2,40  | 0,00 | -1,21  | 0,16 | -1,21 | 0,24 | -1,24 | 0,13 | -1,11 | 0,40 | -1,29 | 0,06 |
| S100A9         | 1,64  | 0,02 | -1,08 | 0,25 | 1,07  | 0,61 | 39,87  | 0,00 | -1,09 | 0,33 | 1,01  | 0,87 | -1,02 | 0,80 | 1,05  | 0,67 |
| DCBLD2         | 1,62  | 0,00 | 1,17  | 0,39 | 1,12  | 0,28 | 1,13   | 0,19 | 1,01  | 0,93 | -1,02 | 0,86 | 1,02  | 0,90 | -1,12 | 0,37 |
| SDR16C5        | 1,61  | 0,00 | 1,34  | 0,25 | 4,09  | 0,00 | 4,39   | 0,00 | ---   | ---  | ---   | ---  | ---   | ---  | ---   | ---  |
| PRSS21         | 1,58  | 0,02 | 1,27  | 0,19 | ---   | ---  | ---    | ---  | -1,06 | 0,64 | 1,06  | 0,54 | 1,06  | 0,46 | -1,02 | 0,83 |
| IFNE           | 1,58  | 0,00 | 1,11  | 0,36 | ---   | ---  | ---    | ---  | ---   | ---  | ---   | ---  | ---   | ---  | ---   | ---  |
| MT2A           | 1,57  | 0,01 | 1,10  | 0,74 | -1,65 | 0,01 | -1,55  | 0,01 | 1,17  | 0,66 | 1,99  | 0,04 | 1,77  | 0,06 | 1,14  | 0,73 |
| C6orf1         | 1,57  | 0,00 | 1,08  | 0,34 | ---   | ---  | ---    | ---  | ---   | ---  | ---   | ---  | ---   | ---  | ---   | ---  |
| GPR126         | 1,56  | 0,00 | 1,49  | 0,01 | 2,04  | 0,00 | 6,41   | 0,00 | 2,55  | 0,03 | 2,77  | 0,01 | 3,98  | 0,00 | 1,70  | 0,02 |
| SLC22A3        | 1,55  | 0,01 | 1,02  | 0,90 | 1,56  | 0,01 | -1,08  | 0,55 | -1,08 | 0,39 | -1,12 | 0,13 | -1,02 | 0,82 | -1,02 | 0,81 |
| KRT7           | 1,54  | 0,04 | 1,45  | 0,07 | 1,06  | 0,32 | 2,53   | 0,00 | 1,30  | 0,15 | 1,05  | 0,54 | 1,01  | 0,83 | -1,02 | 0,80 |
| F3             | 1,54  | 0,01 | 1,24  | 0,04 | 2,38  | 0,00 | 3,38   | 0,00 | -1,27 | 0,29 | -1,16 | 0,40 | -1,12 | 0,47 | -1,09 | 0,60 |
| ARMCX1         | 1,52  | 0,01 | 1,20  | 0,11 | 1,45  | 0,09 | 1,55   | 0,01 | 1,10  | 0,29 | 1,02  | 0,77 | 1,04  | 0,60 | 1,03  | 0,66 |
| NPSR1          | 1,51  | 0,03 | 1,39  | 0,03 | ---   | ---  | ---    | ---  | ---   | ---  | ---   | ---  | ---   | ---  | ---   | ---  |
| CRIP1          | 1,50  | 0,03 | 1,28  | 0,08 | -1,20 | 0,39 | -2,19  | 0,00 | 2,77  | 0,00 | 1,29  | 0,44 | 1,51  | 0,07 | 2,06  | 0,04 |
| EPHB6          | 1,50  | 0,04 | 1,03  | 0,85 | ---   | ---  | ---    | ---  | 1,32  | 0,09 | 1,31  | 0,06 | 1,12  | 0,30 | 1,07  | 0,69 |
| RBP4           | -1,51 | 0,00 | -1,38 | 0,11 | 2,35  | 0,01 | 1,32   | 0,26 | 1,26  | 0,14 | 1,17  | 0,07 | 1,15  | 0,11 | 1,03  | 0,64 |
| HMOX1          | -1,52 | 0,03 | -1,24 | 0,42 | -4,34 | 0,00 | -2,66  | 0,00 | -1,84 | 0,02 | 1,43  | 0,23 | 1,61  | 0,11 | -1,16 | 0,45 |
| KLHL13         | -1,54 | 0,05 | -1,26 | 0,26 | -1,00 | 0,98 | -1,72  | 0,00 | ---   | ---  | ---   | ---  | ---   | ---  | ---   | ---  |
| ZBED3          | -1,55 | 0,04 | 1,16  | 0,32 | 1,16  | 0,17 | 1,00   | 1,00 | ---   | ---  | ---   | ---  | ---   | ---  | ---   | ---  |
| ABCC4          | -1,56 | 0,00 | -1,07 | 0,15 | -2,13 | 0,01 | -1,60  | 0,05 | -1,30 | 0,15 | -1,26 | 0,21 | -1,22 | 0,27 | -1,17 | 0,36 |
| SLC7A7         | -1,56 | 0,03 | 1,09  | 0,55 | -1,85 | 0,04 | 1,96   | 0,01 | 1,72  | 0,26 | 4,60  | 0,00 | 5,85  | 0,00 | 6,74  | 0,00 |
| CCND2          | -1,58 | 0,02 | -1,42 | 0,09 | -2,59 | 0,00 | -1,68  | 0,03 | -1,57 | 0,01 | 1,01  | 0,95 | 1,10  | 0,15 | 1,02  | 0,78 |
| ST6GAL2        | -1,61 | 0,03 | -1,48 | 0,02 | 1,72  | 0,01 | -1,03  | 0,33 | ---   | ---  | ---   | ---  | ---   | ---  | ---   | ---  |
| MUC12          | -1,62 | 0,02 | -1,41 | 0,05 | 1,08  | 0,87 | -4,62  | 0,00 | ---   | ---  | ---   | ---  | ---   | ---  | ---   | ---  |
| QPRT           | -1,62 | 0,01 | -1,35 | 0,07 | -1,15 | 0,47 | -1,87  | 0,00 | -1,08 | 0,72 | 1,64  | 0,00 | 1,58  | 0,00 | 1,20  | 0,10 |
| MYLK           | -1,63 | 0,02 | -1,31 | 0,19 | 1,10  | 0,63 | -1,55  | 0,01 | -1,33 | 0,38 | -1,68 | 0,05 | -1,25 | 0,19 | 1,10  | 0,53 |
| PDZK1IP1       | -1,65 | 0,01 | -1,38 | 0,05 | -1,81 | 0,00 | 8,48   | 0,00 | -1,31 | 0,50 | -2,14 | 0,07 | -2,49 | 0,03 | -1,32 | 0,51 |
| MUC17          | -1,65 | 0,03 | 1,05  | 0,91 | 1,51  | 0,16 | 1,49   | 0,35 | ---   | ---  | ---   | ---  | ---   | ---  | ---   | ---  |
| AK4            | -1,68 | 0,04 | 1,01  | 0,88 | ---   | ---  | ---    | ---  | ---   | ---  | ---   | ---  | ---   | ---  | ---   | ---  |
| CTTNBP2        | -1,74 | 0,02 | -1,49 | 0,04 | -1,12 | 0,32 | -1,48  | 0,00 | ---   | ---  | ---   | ---  | ---   | ---  | ---   | ---  |
| ACOX2          | -1,76 | 0,02 | -1,28 | 0,45 | -1,52 | 0,00 | -2,20  | 0,00 | 1,13  | 0,64 | 2,64  | 0,00 | 2,47  | 0,00 | 1,89  | 0,00 |
| FAM134B        | -1,76 | 0,01 | -1,29 | 0,15 | -1,77 | 0,01 | -2,22  | 0,00 | -2,87 | 0,00 | -2,00 | 0,00 | -2,20 | 0,00 | -1,73 | 0,03 |
| FRMD3          | -1,78 | 0,03 | -1,21 | 0,32 | -1,20 | 0,33 | 1,15   | 0,35 | ---   | ---  | ---   | ---  | ---   | ---  | ---   | ---  |
| RNF186         | -1,87 | 0,02 | 1,01  | 0,96 | -2,88 | 0,00 | -1,63  | 0,01 | -1,93 | 0,00 | 3,37  | 0,00 | 3,00  | 0,00 | 1,09  | 0,82 |
| SST            | -1,90 | 0,03 | -1,59 | 0,09 | 1,81  | 0,19 | -2,83  | 0,02 | 17,55 | 0,00 | 10,32 | 0,00 | 7,88  | 0,00 | 2,35  | 0,04 |
| ACSM3          | -2,02 | 0,01 | -1,47 | 0,22 | -2,94 | 0,00 | -2,31  | 0,00 | -1,45 | 0,00 | -1,49 | 0,01 | -1,59 | 0,00 | -1,66 | 0,00 |
| DDC            | -2,04 | 0,00 | -1,41 | 0,07 | -3,62 | 0,00 | -3,95  | 0,00 | 1,05  | 0,83 | 1,94  | 0,00 | 2,07  | 0,00 | 2,03  | 0,00 |
| C5orf46        | -2,17 | 0,01 | -1,41 | 0,11 | ---   | ---  | ---    | ---  | ---   | ---  | ---   | ---  | ---   | ---  | ---   | ---  |
| ANXA13         | -2,24 | 0,01 | -1,16 | 0,62 | -1,27 | 0,16 | -1,63  | 0,03 | 1,17  | 0,66 | 3,08  | 0,00 | 8,53  | 0,00 | 2,94  | 0,01 |
| AKR1C1         | -2,31 | 0,02 | -1,53 | 0,17 | -2,78 | 0,00 | 1,00   | 0,99 | 2,77  | 0,00 | 2,31  | 0,00 | 2,18  | 0,00 | -1,01 | 0,94 |
| LAMA1          | -2,64 | 0,04 | -1,66 | 0,17 | -3,57 | 0,00 | -11,20 | 0,00 | ---   | ---  | ---   | ---  | ---   | ---  | ---   | ---  |
| NUPR1          | -2,93 | 0,04 | -2,09 | 0,08 | -1,14 | 0,51 | -1,05  | 0,78 | -1,63 | 0,00 | -1,55 | 0,01 | -2,01 | 0,00 | -2,13 | 0,00 |
| <b>d-EpOCs</b> |       |      |       |      |       |      |        |      |       |      |       |      |       |      |       |      |
| KLK8           | 1,93  | 0,06 | 3,97  | 0,00 | -1,01 | 0,82 | 1,18   | 0,41 | 1,18  | 0,14 | 1,22  | 0,11 | 1,12  | 0,21 | 1,05  | 0,58 |
| IGFBP1         | 1,98  | 0,16 | 3,57  | 0,00 | ---   | ---  | ---    | ---  | 1,01  | 0,94 | 1,01  | 0,92 | 1,01  | 0,86 | -1,02 | 0,83 |
| PRSS1          | 2,63  | 0,05 | 3,53  | 0,02 | 1,02  | 0,61 | 1,22   | 0,07 | 1,07  | 0,56 | 1,22  | 0,13 | 1,19  | 0,06 | 1,14  | 0,19 |
| GATM           | 1,88  | 0,06 | 2,54  | 0,02 | 1,07  | 0,60 | -1,47  | 0,00 | 3,67  | 0,00 | 4,80  | 0,00 | 6,76  | 0,00 | 3,35  | 0,00 |

|            |       |      |              |             |               |             |                |             |               |             |               |             |               |             |               |             |
|------------|-------|------|--------------|-------------|---------------|-------------|----------------|-------------|---------------|-------------|---------------|-------------|---------------|-------------|---------------|-------------|
| FRY        | 1,06  | 0,30 | <b>2,40</b>  | <b>0,00</b> | 1,22          | 0,36        | <b>1,77</b>    | <b>0,00</b> | 1,12          | 0,20        | 1,01          | 0,85        | -1,02         | 0,74        | 1,02          | 0,79        |
| TNNT1      | 1,29  | 0,24 | <b>2,32</b>  | <b>0,00</b> | ---           | ---         | ---            | ---         | -1,02         | 0,87        | 1,10          | 0,28        | 1,02          | 0,75        | -1,04         | 0,56        |
| SLC16A4    | 1,65  | 0,11 | <b>2,10</b>  | <b>0,02</b> | 1,41          | 0,01        | <b>2,45</b>    | <b>0,00</b> | 1,21          | 0,13        | <b>1,64</b>   | <b>0,00</b> | 1,49          | 0,00        | <b>1,66</b>   | <b>0,00</b> |
| AGPAT4     | 1,18  | 0,05 | <b>2,00</b>  | <b>0,01</b> | ---           | ---         | ---            | ---         | -1,12         | 0,46        | -1,05         | 0,65        | -1,11         | 0,30        | -1,21         | 0,11        |
| MITF       | 1,50  | 0,01 | <b>1,96</b>  | <b>0,00</b> | <b>1,59</b>   | <b>0,01</b> | <b>1,82</b>    | <b>0,00</b> | 1,38          | 0,05        | 1,11          | 0,23        | 1,04          | 0,56        | 1,01          | 0,84        |
| KLK11      | 1,87  | 0,05 | <b>1,86</b>  | <b>0,01</b> | 1,31          | 0,00        | <b>2,70</b>    | <b>0,00</b> | <b>2,70</b>   | <b>0,02</b> | 1,32          | 0,04        | 1,16          | 0,10        | 1,12          | 0,27        |
| STOM       | 1,31  | 0,10 | <b>1,79</b>  | <b>0,02</b> | 1,04          | 0,89        | <b>4,81</b>    | <b>0,00</b> | -1,65         | 0,10        | 1,00          | 0,98        | 1,09          | 0,51        | 1,28          | 0,31        |
| HLA-DQB1   | 1,09  | 0,82 | <b>1,76</b>  | <b>0,04</b> | <b>1,83</b>   | <b>0,04</b> | <b>3,27</b>    | <b>0,00</b> | 1,17          | 0,55        | 1,41          | 0,26        | <b>1,88</b>   | <b>0,01</b> | <b>3,27</b>   | <b>0,00</b> |
| NTN4       | 1,33  | 0,07 | <b>1,73</b>  | <b>0,00</b> | -1,32         | 0,08        | <b>-2,64</b>   | <b>0,00</b> | ---           | ---         | ---           | ---         | ---           | ---         | ---           | ---         |
| PSORS1C3   | 1,20  | 0,23 | <b>1,71</b>  | <b>0,04</b> | ---           | ---         | ---            | ---         | ---           | ---         | ---           | ---         | ---           | ---         | ---           | ---         |
| CLDN18     | 1,07  | 0,07 | <b>1,69</b>  | <b>0,02</b> | 1,19          | 0,12        | <b>2,15</b>    | <b>0,02</b> | <b>17,96</b>  | <b>0,01</b> | <b>2,43</b>   | <b>0,02</b> | 1,17          | 0,09        | 1,13          | 0,15        |
| THNSL2     | 1,24  | 0,29 | <b>1,66</b>  | <b>0,02</b> | ---           | ---         | ---            | ---         | 1,20          | 0,21        | 1,34          | 0,06        | 1,29          | 0,03        | 1,21          | 0,02        |
| COL6A1     | 1,08  | 0,53 | <b>1,63</b>  | <b>0,03</b> | <b>2,70</b>   | <b>0,00</b> | <b>4,12</b>    | <b>0,00</b> | 1,08          | 0,53        | 1,07          | 0,60        | -1,12         | 0,21        | -1,05         | 0,53        |
| ZNF204P    | 1,06  | 0,66 | <b>1,61</b>  | <b>0,02</b> | ---           | ---         | ---            | ---         | ---           | ---         | ---           | ---         | ---           | ---         | ---           | ---         |
| C12orf56   | 1,01  | 0,91 | <b>1,61</b>  | <b>0,04</b> | ---           | ---         | ---            | ---         | ---           | ---         | ---           | ---         | ---           | ---         | ---           | ---         |
| PSAT1      | -1,31 | 0,27 | <b>1,60</b>  | <b>0,04</b> | <b>3,18</b>   | <b>0,00</b> | <b>8,57</b>    | <b>0,00</b> | 1,31          | 0,04        | 1,07          | 0,52        | -1,06         | 0,57        | 1,13          | 0,28        |
| SERPINI1   | 1,15  | 0,21 | <b>1,59</b>  | <b>0,01</b> | 1,14          | 0,23        | <b>3,16</b>    | <b>0,00</b> | ---           | ---         | ---           | ---         | ---           | ---         | ---           | ---         |
| SH3YL1     | 1,54  | 0,06 | <b>1,57</b>  | <b>0,04</b> | -1,10         | 0,40        | -1,37          | 0,01        | -1,39         | 0,13        | -1,47         | 0,13        | -1,15         | 0,30        | -1,23         | 0,27        |
| TRNP1      | 1,15  | 0,08 | <b>1,54</b>  | <b>0,03</b> | 1,11          | 0,27        | <b>2,17</b>    | <b>0,00</b> | ---           | ---         | ---           | ---         | ---           | ---         | ---           | ---         |
| SERPINB9P1 | 1,16  | 0,23 | <b>1,54</b>  | <b>0,05</b> | ---           | ---         | ---            | ---         | ---           | ---         | ---           | ---         | ---           | ---         | ---           | ---         |
| RBM4B      | 1,26  | 0,04 | <b>1,54</b>  | <b>0,00</b> | -1,13         | 0,43        | 1,04           | 0,71        | 1,15          | 0,14        | 1,04          | 0,72        | -1,07         | 0,52        | 1,18          | 0,20        |
| CFB        | 1,19  | 0,02 | <b>1,53</b>  | <b>0,01</b> | -1,08         | 0,76        | <b>14,07</b>   | <b>0,00</b> | 1,61          | 0,27        | <b>3,05</b>   | <b>0,00</b> | <b>2,69</b>   | <b>0,00</b> | <b>3,14</b>   | <b>0,00</b> |
| RASSF4     | -1,50 | 0,01 | <b>-1,52</b> | <b>0,01</b> | 1,03          | 0,49        | 1,21           | 0,02        | 1,03          | 0,80        | 1,24          | 0,04        | 1,15          | 0,07        | 1,08          | 0,42        |
| MICALCL    | -1,41 | 0,03 | <b>-1,52</b> | <b>0,03</b> | ---           | ---         | ---            | ---         | ---           | ---         | ---           | ---         | ---           | ---         | ---           | ---         |
| WNT11      | -1,00 | 0,96 | <b>-1,53</b> | <b>0,02</b> | ---           | ---         | ---            | ---         | -1,03         | 0,78        | -1,08         | 0,48        | 1,12          | 0,16        | -1,02         | 0,80        |
| RHCG       | -1,09 | 0,18 | <b>-1,54</b> | <b>0,03</b> | ---           | ---         | ---            | ---         | 1,17          | 0,10        | 1,25          | 0,03        | 1,07          | 0,38        | 1,10          | 0,31        |
| AKAP7      | -1,37 | 0,00 | <b>-1,57</b> | <b>0,04</b> | -1,12         | 0,34        | <b>-1,31</b>   | <b>0,01</b> | -1,07         | 0,37        | 1,16          | 0,09        | 1,19          | 0,02        | -1,06         | 0,38        |
| RBM3       | -1,14 | 0,23 | <b>-1,59</b> | <b>0,02</b> | -1,16         | 0,50        | -1,32          | 0,10        | -1,36         | 0,02        | -1,15         | 0,18        | -1,28         | 0,05        | -1,26         | 0,03        |
| RASL11A    | -1,61 | 0,08 | <b>-1,61</b> | <b>0,03</b> | ---           | ---         | ---            | ---         | ---           | ---         | ---           | ---         | ---           | ---         | ---           | ---         |
| CYP27A1    | -1,17 | 0,21 | <b>-1,66</b> | <b>0,03</b> | <b>-3,19</b>  | <b>0,00</b> | <b>-4,10</b>   | <b>0,00</b> | -1,02         | 0,92        | <b>1,90</b>   | <b>0,00</b> | <b>1,97</b>   | <b>0,00</b> | <b>1,95</b>   | <b>0,00</b> |
| CHGA       | -1,18 | 0,51 | <b>-1,69</b> | <b>0,01</b> | 1,50          | 0,02        | <b>-1,60</b>   | <b>0,02</b> | 1,11          | 0,54        | -1,07         | 0,77        | -1,31         | 0,25        | 1,10          | 0,54        |
| HSD11B2    | 1,15  | 0,36 | <b>-1,70</b> | <b>0,04</b> | -1,34         | 0,07        | <b>-2,66</b>   | <b>0,00</b> | <b>-6,78</b>  | <b>0,00</b> | <b>-4,02</b>  | <b>0,00</b> | <b>-3,98</b>  | <b>0,00</b> | <b>-3,51</b>  | <b>0,00</b> |
| MCOLN2     | -1,38 | 0,20 | <b>-1,74</b> | <b>0,05</b> | <b>-10,81</b> | <b>0,00</b> | <b>-6,52</b>   | <b>0,00</b> | ---           | ---         | ---           | ---         | ---           | ---         | ---           | ---         |
| LGALS2     | -1,09 | 0,23 | <b>-1,75</b> | <b>0,03</b> | -1,69         | 0,06        | <b>-3,55</b>   | <b>0,00</b> | -1,70         | 0,42        | <b>-1,77</b>  | <b>0,04</b> | -1,25         | 0,28        | <b>2,97</b>   | <b>0,01</b> |
| ID3        | -1,18 | 0,65 | <b>-1,76</b> | <b>0,03</b> | -1,51         | 0,05        | <b>-2,12</b>   | <b>0,00</b> | 1,02          | 0,89        | <b>-1,36</b>  | <b>0,02</b> | <b>-1,73</b>  | <b>0,00</b> | <b>-1,77</b>  | <b>0,00</b> |
| VSTM2L     | -1,16 | 0,41 | <b>-1,77</b> | <b>0,01</b> | ---           | ---         | ---            | ---         | ---           | ---         | ---           | ---         | ---           | ---         | ---           | ---         |
| GCG        | -1,37 | 0,34 | <b>-1,78</b> | <b>0,04</b> | <b>3,34</b>   | <b>0,00</b> | -1,19          | 0,60        | -2,60         | 0,27        | <b>-7,32</b>  | <b>0,00</b> | <b>-6,78</b>  | <b>0,00</b> | 2,22          | 0,33        |
| LCN15      | -1,05 | 0,62 | <b>-1,87</b> | <b>0,01</b> | ---           | ---         | ---            | ---         | ---           | ---         | ---           | ---         | ---           | ---         | ---           | ---         |
| ALDH3A1    | -1,31 | 0,14 | <b>-1,92</b> | <b>0,02</b> | -1,40         | 0,01        | -1,26          | 0,26        | <b>10,12</b>  | <b>0,01</b> | <b>2,10</b>   | <b>0,04</b> | 1,14          | 0,14        | -1,07         | 0,59        |
| PPBP       | -1,01 | 0,96 | <b>-2,15</b> | <b>0,02</b> | 1,02          | 0,58        | <b>1,63</b>    | <b>0,01</b> | 1,06          | 0,55        | 1,06          | 0,51        | 1,02          | 0,86        | 1,01          | 0,89        |
| CEACAM8    | -1,13 | 0,21 | <b>-2,18</b> | <b>0,01</b> | ---           | ---         | ---            | ---         | -1,02         | 0,84        | -1,00         | 0,99        | 1,01          | 0,95        | -1,02         | 0,79        |
| ATP12A     | 1,11  | 0,22 | <b>-2,30</b> | <b>0,04</b> | ---           | ---         | ---            | ---         | ---           | ---         | ---           | ---         | ---           | ---         | ---           | ---         |
| CLCA1      | 1,07  | 0,83 | <b>-2,53</b> | <b>0,04</b> | -1,31         | 0,12        | -1,26          | 0,27        | <b>-10,34</b> | <b>0,01</b> | <b>-2,17</b>  | <b>0,05</b> | <b>-2,00</b>  | <b>0,00</b> | -1,07         | 0,85        |
| CD177      | -1,48 | 0,21 | <b>-2,55</b> | <b>0,00</b> | <b>-8,37</b>  | <b>0,00</b> | <b>-12,68</b>  | <b>0,00</b> | <b>-6,05</b>  | <b>0,00</b> | <b>-6,13</b>  | <b>0,00</b> | <b>-6,18</b>  | <b>0,00</b> | <b>-6,22</b>  | <b>0,00</b> |
| ZG16       | -1,30 | 0,10 | <b>-2,88</b> | <b>0,04</b> | ---           | ---         | ---            | ---         | <b>-19,67</b> | <b>0,00</b> | <b>-4,09</b>  | <b>0,00</b> | <b>-4,29</b>  | <b>0,00</b> | <b>-2,69</b>  | <b>0,03</b> |
| NXPE4      | -1,78 | 0,10 | <b>-3,01</b> | <b>0,02</b> | ---           | ---         | ---            | ---         | <b>-6,21</b>  | <b>0,00</b> | <b>-5,45</b>  | <b>0,00</b> | <b>-6,15</b>  | <b>0,00</b> | <b>-6,06</b>  | <b>0,00</b> |
| MS4A12     | 1,25  | 0,48 | <b>-3,13</b> | <b>0,03</b> | <b>-6,51</b>  | <b>0,00</b> | <b>-7,10</b>   | <b>0,00</b> | <b>-41,28</b> | <b>0,00</b> | <b>-47,47</b> | <b>0,00</b> | <b>-47,91</b> | <b>0,00</b> | <b>-35,14</b> | <b>0,00</b> |
| CALB1      | -1,06 | 0,56 | <b>-3,18</b> | <b>0,00</b> | ---           | ---         | ---            | ---         | ---           | ---         | ---           | ---         | ---           | ---         | ---           | ---         |
| AQP8       | -1,62 | 0,35 | <b>-3,24</b> | <b>0,01</b> | <b>-50,49</b> | <b>0,00</b> | <b>-391,94</b> | <b>0,00</b> | <b>-24,93</b> | <b>0,00</b> | <b>-29,90</b> | <b>0,00</b> | <b>-28,92</b> | <b>0,00</b> | <b>-24,16</b> | <b>0,00</b> |
